# Supplementary material for: Evaluation of Selected Medicinal, Timber and Ornamental Legume Species’ Seed Oils as Sources of Bioactive Lipophilic Compounds
Source: MDPI journal article supplement (doi:10.3390/molecules28103994), 2023-05-09
Supplement: s1 [file s1]

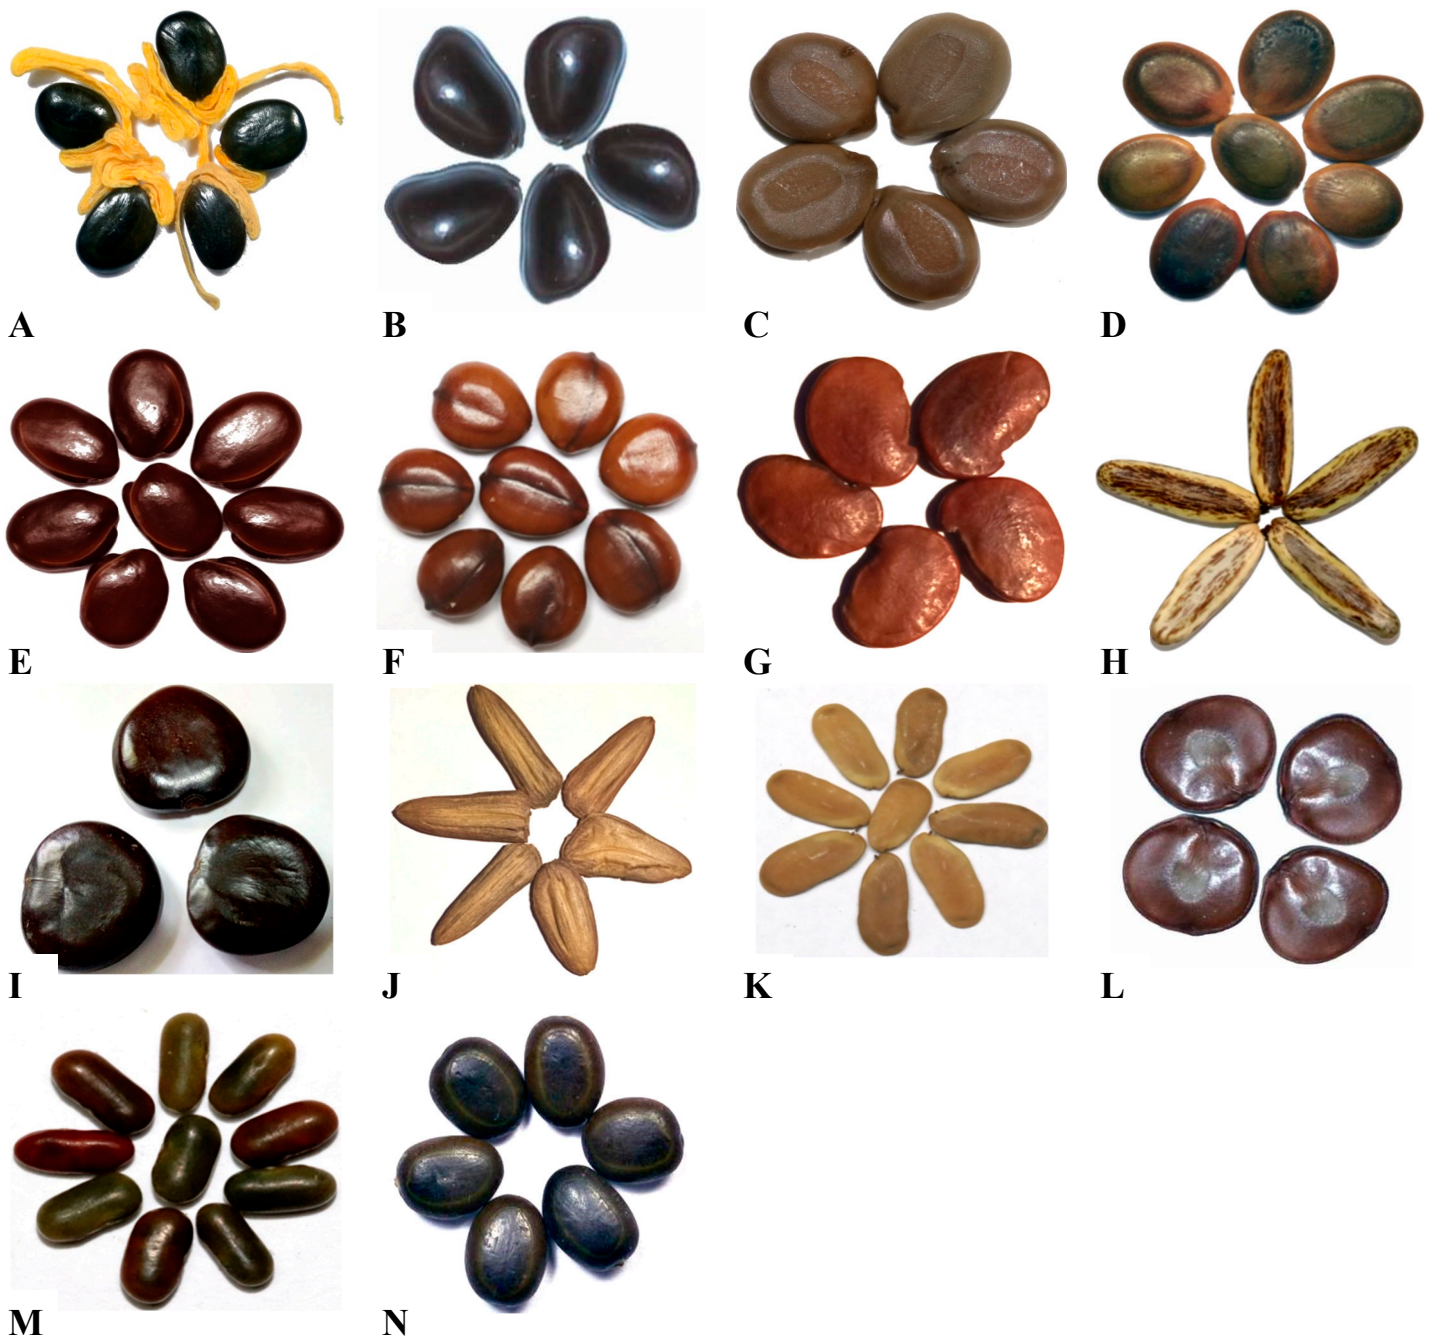

**Figure S1.** The seeds of fourteen selected tree species belonging to the Fabaceae family: *Acacia auriculiformis* (A), *Acacia concinna* (B), *Albizia lebbeck* (C), *Albizia odoratissima* (D), *Bauhinia racemosa* (E), *Cassia fistula* (F), *Dalbergia latifolia* (G), *Delonix regia* (H), *Entada phaseoloides* (I), *Hardwickia binata* (J), *Peltophorum pterocarpum* (K), *Senegalia catechu* (L), *Sesbania sesban* (M), *Vachellia nilotica* (N).

**Table S1.** Physical characteristics of the seeds of fourteen selected tree species belonging to the Fabaceae family.

| Species                  | Colour         | Shape                | Seed mass, mg |
|--------------------------|----------------|----------------------|---------------|
| <i>A. auriculiformis</i> | Brown          | Oblong-ovate         | 33 ± 2        |
| <i>A. concinna</i>       | Brown          | Ovate-globular       | 224 ± 5       |
| <i>A. lebbbeck</i>       | Brown          | Flat-elliptic        | 74 ± 1        |
| <i>A. odoratissima</i>   | Brown          | Oblong-elliptic      | 159 ± 3       |
| <i>B. racemosa</i>       | Reddish-brown  | Ovoid-compressed     | 206 ± 5       |
| <i>C. fistula</i>        | Light brown    | Flattened ovate      | 292 ± 6       |
| <i>D. latifolia</i>      | Light brown    | Reniform-flattened   | 93 ± 3        |
| <i>D. regia</i>          | Glossy brown   | Oblong               | 510 ± 5       |
| <i>E. phaseoloides</i>   | Dark red-brown | Heart shaped         | 23623 ± 30    |
| <i>H. binata</i>         | Light brown    | Oblong ovate         | 295 ± 5       |
| <i>P. pterocarpum</i>    | Light brown    | Oblong               | 94 ± 10       |
| <i>S. catechu</i>        | Brown          | Elliptic-ovate       | 57 ± 3        |
| <i>S. sesben</i>         | Brownish green | Narrow kidney shaped | 15 ± 1        |
| <i>V. nilotica</i>       | Brown          | Circular-ovate       | 198 ± 4       |

**Table S2.** Sum of SFA, MUFA, PUFA and UFA (%) and fatty acids ratios in the seed oils of fourteen selected tree species belonging to the Fabaceae family.

| Species                  | ΣSFA | ΣMUFA | ΣPUFA | ΣUFA | Fatty acids<br>ratio<br>ΣUFA/ΣSFA |
|--------------------------|------|-------|-------|------|-----------------------------------|
| <i>A. auriculiformis</i> | 18.9 | 25.3  | 55.7  | 81.1 | 4.3                               |
| <i>A. concinna</i>       | 11.3 | 33.0  | 55.7  | 88.7 | 7.8                               |
| <i>A. lebbbeck</i>       | 30.0 | 23.0  | 47.0  | 70.0 | 2.3                               |
| <i>A. odoratissima</i>   | 21.3 | 14.4  | 64.3  | 78.7 | 3.7                               |
| <i>B. racemosa</i>       | 11.1 | 34.8  | 54.1  | 89.0 | 8.0                               |
| <i>C. fistula</i>        | 10.4 | 34.7  | 54.9  | 89.6 | 8.6                               |
| <i>D. latifolia</i>      | 27.0 | 23.3  | 49.7  | 73.0 | 2.7                               |
| <i>D. regia</i>          | 27.5 | 14.9  | 57.6  | 72.5 | 2.6                               |
| <i>E. phaseoloides</i>   | 14.9 | 25.3  | 59.8  | 85.1 | 5.7                               |
| <i>H. binata</i>         | 36.1 | 21.7  | 42.3  | 63.9 | 1.8                               |
| <i>P. pterocarpum</i>    | 33.1 | 20.0  | 47.0  | 66.9 | 2.0                               |
| <i>S. catechu</i>        | 24.3 | 33.1  | 42.6  | 75.7 | 3.1                               |
| <i>S. sesben</i>         | 11.6 | 33.3  | 55.1  | 88.4 | 7.6                               |
| <i>V. nilotica</i>       | 20.2 | 26.4  | 53.4  | 79.8 | 4.0                               |

ΣSFA, sum of saturated fatty acids; ΣMUFA, sum of monounsaturated fatty acids; ΣPUFA, sum of polyunsaturated fatty acids; ΣUFA, sum of unsaturated fatty acids.

**Table S3.** Content of squalene and total carotenoids, sterols, and tocochromanols (mg/100 g dw seeds) in the seeds of fourteen selected tree species belonging to the Fabaceae family.

| Species                  | Squalene  | Total       |             |                |
|--------------------------|-----------|-------------|-------------|----------------|
|                          |           | Carotenoids | Sterols     | Tocochromanols |
| <i>A. auriculiformis</i> | nd        | 3.2 ± 0.2   | 45.2 ± 1.8  | 14.7 ± 0.6     |
| <i>A. concinna</i>       | nd        | 0.1 ± 0.0   | 44.5 ± 3.7  | 2.2 ± 0.2      |
| <i>A. lebbbeck</i>       | nd        | 1.5 ± 0.1   | 33.1 ± 1.4  | 14.4 ± 0.9     |
| <i>A. odoratissima</i>   | nd        | 1.1 ± 0.1   | 31.7 ± 1.5  | 16.5 ± 0.1     |
| <i>B. racemosa</i>       | 1.1 ± 0.1 | 0.3 ± 0.0   | 31.5 ± 1.5  | 5.8 ± 0.3      |
| <i>C. fistula</i>        | 9.5 ± 0.3 | 0.3 ± 0.0   | 43.8 ± 1.8  | 7.8 ± 0.3      |
| <i>D. latifolia</i>      | nd        | 0.4 ± 0.0   | 42.7 ± 1.8  | 30.8 ± 1.4     |
| <i>D. regia</i>          | nd        | 0.4 ± 0.0   | 39.0 ± 1.6  | 11.3 ± 0.1     |
| <i>E. phaseoloides</i>   | nd        | tr          | 14.7 ± 0.7  | 6.1 ± 0.2      |
| <i>H. binata</i>         | nd        | 0.7 ± 0.0   | 127.9 ± 5.9 | 43.3 ± 1.7     |
| <i>P. pterocarpum</i>    | nd        | 0.8 ± 0.0   | 53.6 ± 2.5  | 16.1 ± 0.4     |
| <i>S. catechu</i>        | nd        | 0.7 ± 0.0   | 74.9 ± 2.9  | 7.6 ± 0.2      |
| <i>S. sesben</i>         | 2.0 ± 0.1 | 1.1 ± 0.1   | 47.1 ± 1.7  | 10.1 ± 0.3     |
| <i>V. nilotica</i>       | 2.8 ± 0.2 | 0.2 ± 0.0   | 47.1 ± 1.6  | 8.1 ± 0.3      |

Nd, not detected, tr, trace amount.
